# Supplementary material for: Development of Multi-Objective Production Scheduling Fuzzy Algorithm in Manufacturing
Source: Research Square preprint supplement (doi:10.21203/rs.3.rs-4607659/v1), 2024-07-22
Supplement: Supplementary file 1 [file CMFIS_data_INPUT.xlsx]

## Sheet: Legend
	Input RL1
	INP ID	SUB fx ID
	1	1
	2	1
fuzzyfikált állapot	V kicsi
	A kicsi
	Output RL1
	OUT ID	SUB fx ID
	1	4	← fitting
	2	1
	3	1

## Sheet: input_DATA
MaxDim (V)	CutAng (A)	CutLen (L)	AsmRel (R)	Priority (P)	SMSutil (SU)	SMLutil (LU)	P6Dutil (6U)
30	0	100	0	0	0	0	0
12	0	100	0	0	0	0	0
30	0	100	0	0	0	0	0
30	0	600	0	0	0	0	0
300	0	2500	0	0	40	15	65
300	0	2500	0	70	40	15	65

## Sheet: input_MF
MaxDim – kicsi (V)	1	1	0	0	0	0	20	324
MaxDim – közepes (V)	1	2	0	10	20	200	285	324
MaxDim – nagy (V)	1	3	0	200	324	324	324	324
CutAng – kicsi (A)	2	1	0	0	0	0	30	60
CutAng – nagy (A)	2	2	0	20	60	60	60	60
CutLen – rövid (L)	3	1	0	0	0	0	200	6000
CutLen – közepes (L)	3	2	0	120	200	1500	2000	6000
CutLen – hosszú (L)	3	3	0	1500	2000	6000	6000	6000
AsmRel – nincs (R)	4	1	0	0	0	1	2	100
AsmRel – gyenge (R)	4	2	0	1	2	5	10	100
AsmRel – erős (R)	4	3	0	5	10	100	100	100
Priority – nincs (P)	5	1	0	0	0	0	50	100
Priority – sürgős (P)	5	2	0	0	100	100	100	100
SMSutil – alacsony (SU)	6	1	0	0	0	0	20	100
SMSutil – átlagos (SU)	6	2	0	0	50	50	100	100
SMSutil – magas (SU)	6	3	0	80	100	100	100	100
SMLutil – alacsony (LU)	7	1	0	0	0	0	20	100
SMLutil – átlagos (LU)	7	2	0	0	50	50	100	100
SMLutil – magas (LU)	7	3	0	80	100	100	100	100
P6Dutil – alacsony (6U)	8	1	0	0	0	0	20	100
P6Dutil – átlagos (6U)	8	2	0	0	50	50	100	100
P6Dutil – magas (6U)	8	3	0	80	100	100	100	100

## Sheet: output_MF
SMS pr.nincs	1	1	0	0	0	0	60	100
SMS pr.alacsony	1	2	0	0	25	25	50	100
SMS pr.közepes	1	3	0	50	75	75	100	100
SMS pr.magas	1	4	0	50	100	100	100	100
SML pr.nincs	2	1	0	0	0	0	60	100
SML pr.alacsony	2	2	0	0	25	25	50	100
SML pr.közepes	2	3	0	50	75	75	100	100
SML pr.magas	2	4	0	50	100	100	100	100
P6D pr.nincs	3	1	0	0	0	0	60	100
P6D pr.alacsony	3	2	0	0	25	25	50	100
P6D pr.közepes	3	3	0	50	75	75	100	100
P6D pr.magas	3	4	0	50	100	100	100	100

## Sheet: input_RULES
V kicsi A kicsi RL1		V kicsi A nagy RL2		V közepes A kicsi RL3		V közepes A nagy RL4		V nagy A kicsi RL5		V nagy A nagy RL6		L rövid RL7		L közepes RL8		L nagy RL9		R nincs P sürgős RL 10		R erős P sürgős RL 11		SU alacsony RL 12		LU alacsony RL 13		6U alacsony RL 14		SU átlagos RL 15		LU átlagos RL 16		6U átlagos RL 17		SU magas RL 18		LU magas RL 19		6U magas RL 20
1	1	1	1	1	2	1	2	1	2	1	2	3	1	3	2	3	3	4	1	4	3	6	1	7	1	8	1	6	2	7	2	8	2	6	3	7	3	8	3
2	1	2	2	2	1	2	2	2	1	2	2							5	2	5	2

## Sheet: output_RULES
V kicsi A kicsi RL 1		V kicsi A nagy RL 2		V közepes A kicsi RL 3		V közepes A nagy RL 4		V nagy A kicsi RL 5		V nagy A nagy RL 6		L rövid RL 7		L közepes RL 8		L nagy RL 9		R nincs P sürgős RL 10		R erős P sürgős RL 11		SU alacsony RL 12		LU alacsony RL 13		6U alacsony RL 14		SU átlagos RL 15		LU átlagos RL 16		6U átlagos RL 17		SU magas RL 18		LU magas RL 19		6U magas RL 20
1	4	1	4	1	3	1	2	1	1	1	1	1	4	1	3	1	1	1	3	1	3	1	3	2	3	3	3	1	2	2	2	3	2	1	1	2	1	3	1
2	1	2	2	2	3	2	4	2	4	2	3	2	1	2	3	2	4	2	3	2	3
3	1	3	1	3	2	3	3	3	4	3	4	3	1	3	2	3	4	3	3	3	3
